# Supplementary material for: Grape Seeds Proanthocyanidins: Advanced Technological Preparation and Analytical Characterization
Source: PubMed Central journal article supplement (PMC8001487; doi:10.3390/antiox10030418), 2021-03-09
Supplement: antioxidants-10-00418-s001.pdf [file antioxidants-10-00418-s001.pdf]

## SUPPLEMENTARY DATA

### Grape seeds proanthocyanidins: advanced technological preparation and analytical characterization

Paolo Morazzoni <sup>1</sup>, Paola Vanzani <sup>2</sup>, Sandro Santinello<sup>1</sup>, Antonina Gucciardi<sup>2,3</sup>, Lucio Zennaro<sup>2</sup>, Giovanni Miotto<sup>2,3,4\*</sup> and Fulvio Ursini<sup>2\*</sup>

<sup>1</sup> Distillerie Bonollo Umberto S.p.A., Nutraceutical Division, Mestrino, Padova, Italy

<sup>2</sup> Department of Molecular Medicine, University of Padova, Italy

<sup>3</sup> Proteomics Center, University of Padova and Azienda Ospedaliera di Padova, Padova, Italy

<sup>4</sup> CRIBI Biotechnology Center, University of Padova, Padova, Italy

\* Corresponding Authors: FU, fulvio.ursini@unipd.it; GM, giovanni.miotto@unipd.it

### Supplementary Figures

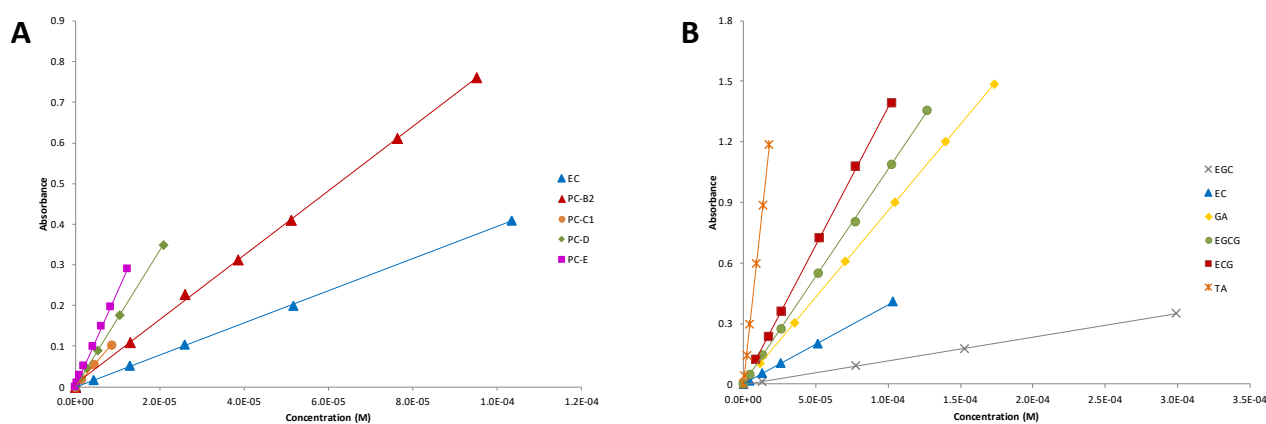

**Figure 1.** UV calibration curves of PACs.

Calibration curve of PACs standards at 280 nm in GPC medium (THF/aqueous LiBr 12mM 95:5, v/v) were used to calculate the molar extinction coefficients ( $\epsilon$ ). The 10 standards are plotted in two separate graphs for clarity, both reporting epicatechin (EC) for comparison. **Plot A:** epicatechin (EC), procyanidin B1, procyanidin C1, procyanidin D, procyanidin E; **Plot B:** gallic acid (GA), epicatechin gallate (ECG), epigallocatechin gallate (EGCG), epigallocatechin (EGC), tannic acid (TA) and EC.

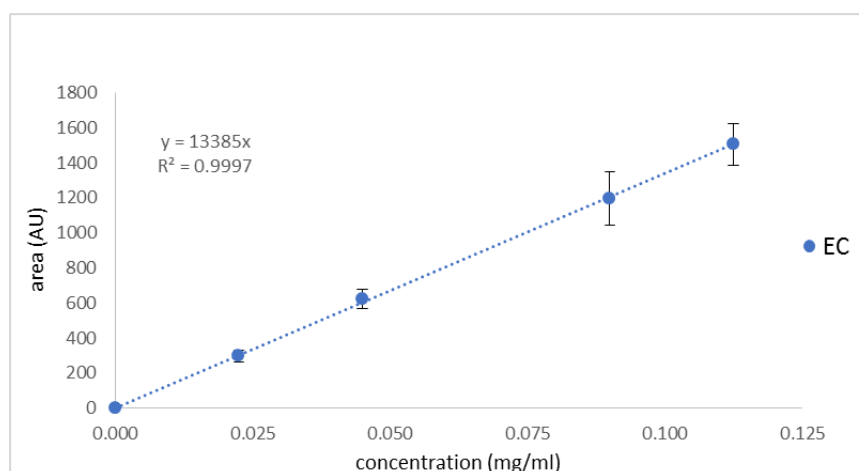

**Figure S2.** The calibration curve of standard (-)-epicatechin (EC) in GPC-UV system.

The amounts of PACs measured in GPC were obtained from epicatechin calibration straight line ( $R^2 = 0.999$ ) from 0.025 to 0.125 mg/mL in THF/aqueous LiBr 12 mM (95:5, v/v). All PACs were considered as catechin since their molar extinction coefficient  $\epsilon$  (Table 1) was proportional to the number of polymerized units.

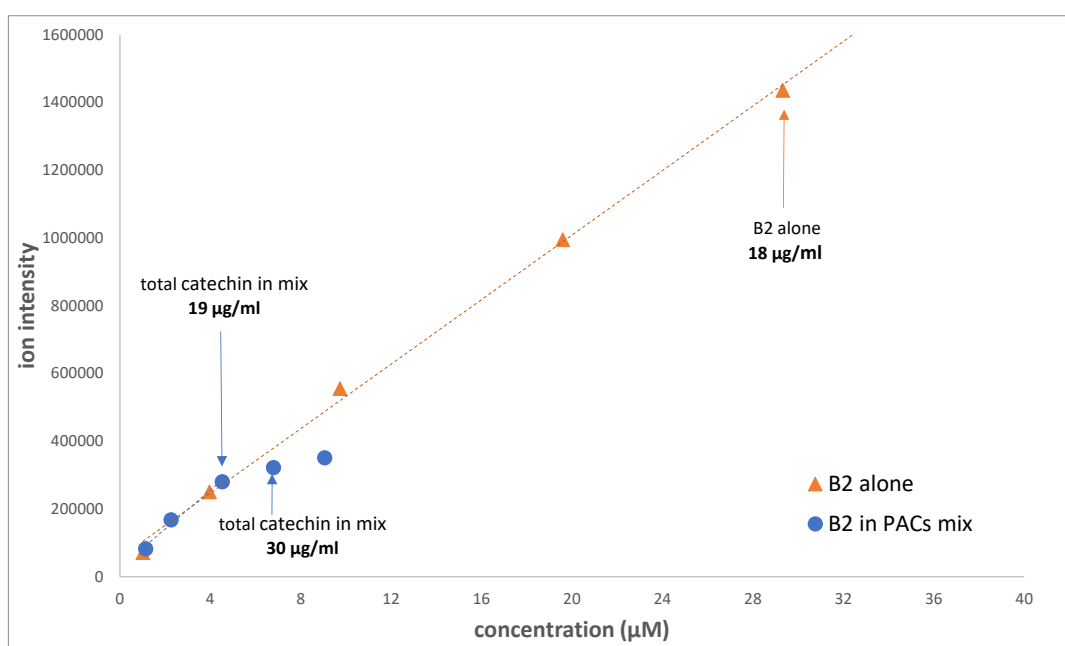

**Figure S3.** Effect of sample complexity to the dynamic range of PACs in ESI-MS-QToF.

Ion signal intensity of PC-B2 alone solution (orange triangles) versus PC-B2 in a PACs mixture composed of equimolar concentrations of EC, ECG, PC-B2, PC-C1, PC-D, and PC-E (blue circles).

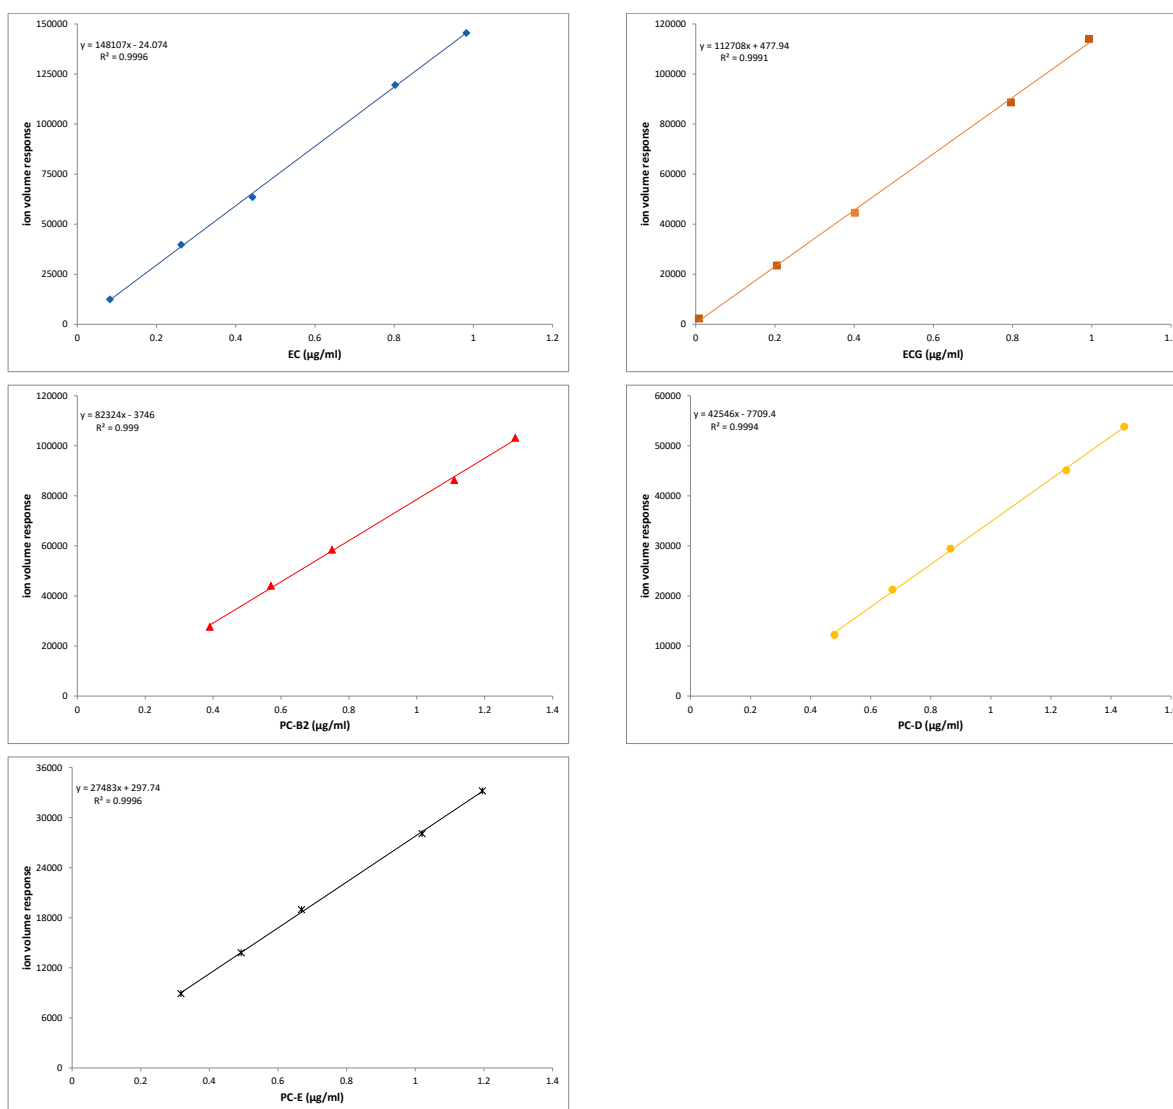

**Figure S4.** ESI-QToF matrix-matched calibration curve.

Calibration curves were made by spiking a dissolved grape seed extract solution (10 µg/ml) with standard PACs mixture solution at four different weight equivalent concentrations (0.2, 0.4, 0.8, 1 µg/mL). The endogenous concentrations of matrix analytes were added to the nominal concentration of spiked standards to generate the correct concentrations.

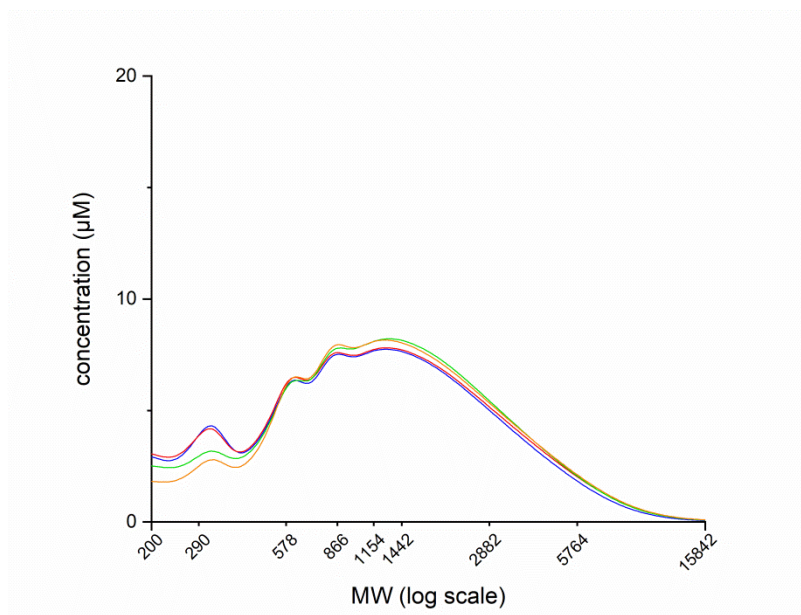

**Figure 5. Concentrations of PACs along GPC profile of four independent preparations of Ecovitis™.** Micromolar concentrations measured in GSEs industrially produced over four months. Concentration was obtained by dividing the molar concentration of catechin equivalents calculated from absorbance for the DP corresponding to the MW in the plot.

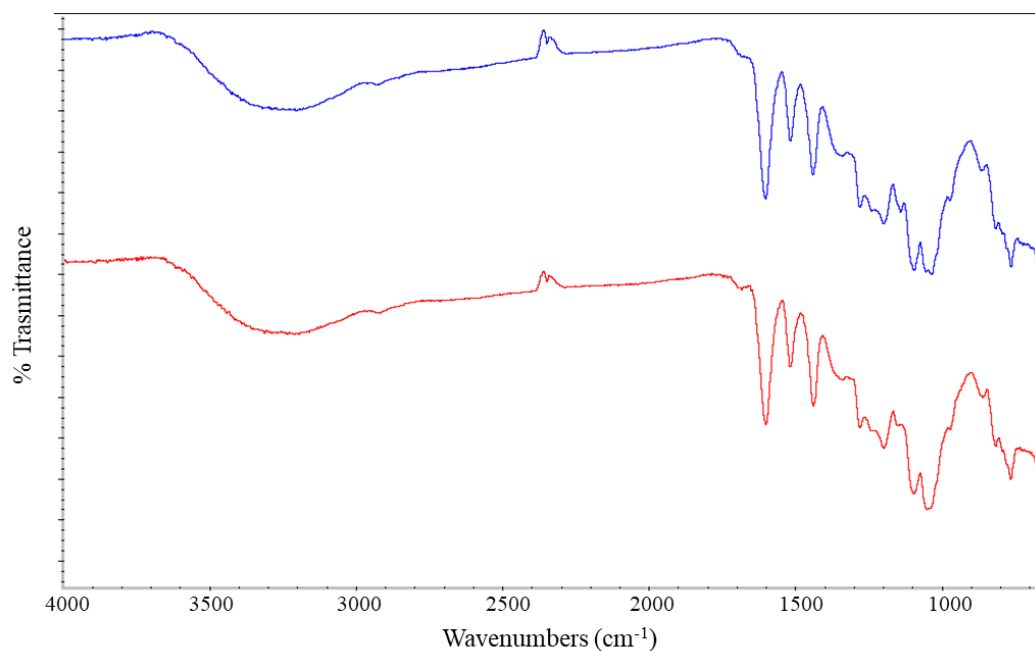

**Figure S6.** FTIR spectra of Ecovitis™ (red line) versus Enovita® (blue line).

ATR-FTIR measurements were performed using Nicolet Nexus FT-IR of Thermo Nicolet Electron Corporation with OMNIC 32 software. The dried grape seeds powders were pressed on top of the ZnSe crystal. A 64-scan was collected with a 4 cm<sup>-1</sup> resolution in the range of 4000–650 cm<sup>-1</sup> at room temperature with automatic atmosphere suppression.

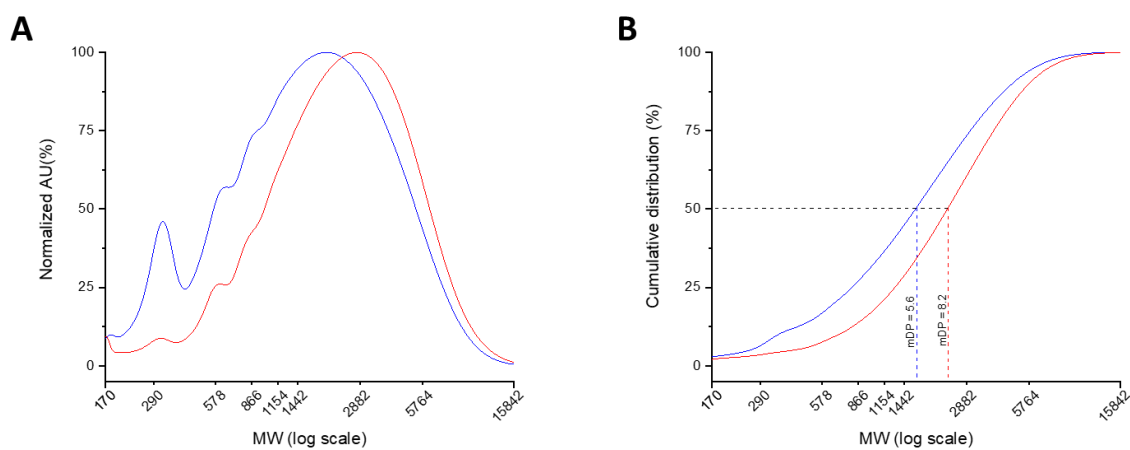

**Figure S7.** Cumulative distribution and median degree of polymerization (mDP) of Ecovitis™ (red line, mDP 8.2) and Enovita®™ (blue line, mDP 5.6) grape seed extracts.

## Supplementary Table

**Table S1.** Proanthocyanidins identified in Ecovitis™ and Enovita® grape seeds extracts by LC-Chip/ESI-QTOF-MS analysis performed in negative ion mode. Concentrations of compounds, as µg/mg of extract, are average obtained from triplicate analyses.

| ID | Compound               | MW               | Enovita® |       |            | Ecovitis™ |       |            |
|----|------------------------|------------------|----------|-------|------------|-----------|-------|------------|
|    |                        |                  | mean     | stdev | ppm        | mean      | stdev | ppm        |
| 1  | G                      | 170.0215         | 1.42     | 0.05  | -11.2      |           |       |            |
| 2  | C/EC                   | 290.079          | 87.04    | 3.00  | -6.0       | 9.51      | 0.23  | -4.3       |
| 3  | EGC                    | 306.0739         | 2.06     | 0.39  | -7.7       |           |       |            |
| 4  | ECG                    | 442.0900         | 5.50     | 1.13  | -3.0       | 2.76      | 0.05  | 2.9        |
| 5  | EGCG                   | 458.0849         | 1.54     | 0.77  | 6.8        |           |       |            |
| 6  | PC (B) 2EC             | 578.1424         | 70.65    | 3.08  | -3.6       | 49.85     | 1.89  | -0.7       |
| 7  | PA (A) 1EC 1EGC        | 592.1217         | 5.36     | 0.18  | 2.6        | 1.06      | 0.06  | 8.4        |
| 8  | PA (B) 1EC 1EGC        | 594.1373         | 3.23     | 0.18  | -5.4       | 1.20      |       | -0.7       |
| 9  | ECG-Glu                | 604.1428         | 3.14     | 0.16  | -7.5       | 1.62      | 0.09  | -0.8       |
| 10 | PC (B) 2EC 1G          | 730.1534         | 21.56    | 0.92  | -2.6       | 11.44     | 0.36  | 0.3        |
| 11 | PA (A) 1EC 1EGC 1G     | 744.1326         | 2.05     | 0.05  | 13.0       |           |       |            |
| 12 | PA (B) 1EC 1EGC 1G     | 746.1483         | 1.43     | 0.05  | 1.9        |           |       |            |
| 13 | PC (B) 3EC             | 866.2058         | 48.02    | 1.89  | -2.1       | 46.36     | 1.77  | 0.7        |
| 14 | PA (A) 2EC 1EGC        | 880.1851         |          |       |            | 1.65      |       | 7.4        |
| 15 | PA (B) 2EC 1EGC/2EC 2G | 882.201/ 882.164 | 3.28     | 0.01  | -16.9/22.7 | 1.89      | 0.03  | -17.3/22.3 |
| 16 | PA (A) 1EC 2EGC        | 896.1800         |          |       |            | 0.90      | 0.03  | 12.9       |
| 17 | PA (B) 1EC 2EGC        | 898.1956         | 1.29     | 0.04  | 13.6       |           |       |            |
| 18 | PC (A) 3EC 1G          | 1016.2011        | 0.9      | 0.30  | 8.5        |           |       |            |
| 19 | PC (B) 3EC 1G          | 1018.2168        | 20.09    | 0.91  | -0.7       | 16.35     | 0.41  | 0.6        |
| 20 | PA (A) 2EC 1EGC 1G     | 1032.1960        | 3.21     | 0.03  | -0.8       | 1.00      | 0.05  | 17.3       |
| 21 | PA (B) 2EC 1EGC 1G     | 1034.2117        | 1.39     | 0.05  | -1.3       |           |       |            |
| 22 | PA (A) 1EC 2EGC 1G     | 1048.1910        | 1.03     | 0.03  | 19.6       |           |       |            |
| 23 | PA (B) 1EC 2EGC 1G     | 1050.2066        | 1.04     | 0.04  | 5.8        |           |       |            |
| 24 | PC (A) 4EC             | 1152.2536        | 6.01     | 0.33  | -2.0       | 4.50      | 0.23  | -0.8       |
| 25 | PC (B) 4EC             | 1154.2692        | 30.00    | 2.00  | -1.7       | 42.47     | 2.24  | 0.2        |
| 26 | PA (A) 3EC 1EGC        | 1168.2485        | 5.68     | 0.29  | -0.9       | 3.25      | 0.09  | 1.3        |
| 27 | PA (B) 3EC 2G          | 1170.2277        | 7.81     | 0.06  | 7.1        | 5.44      | 0.29  | 6.9        |
| 28 | PA (B) 2EC 1EGC 2G     | 1186.2227        | 1.15     | 0.02  | 12.5       |           |       |            |
| 29 | PC (A) 4EC 1G          | 1304.2645        | 3.79     | 0.14  | 1.4        | 1.92      | 0.42  | 0.9        |
| 30 | PC (B) 4EC 1G          | 1306.2802        | 22.25    | 0.71  | -0.7       | 25.12     | 0.69  | 1.2        |
| 31 | PC (A) 5EC             | 1440.3169        | 3.35     | 0.14  | -2.1       | 3.41      | 0.13  | -1.1       |
| 32 | PC (B) 5EC             | 1442.3326        | 26.76    | 1.39  | -0.6       | 42.74     | 1.20  | 1.1        |
| 33 | PA (A) 4EC 1EGC        | 1456.3119        | 5.51     | 0.17  | -4.5       | 3.31      | 0.16  | -0.5       |
| 34 | PC (B) 4EC 2G          | 1458.2911        | 8.23     | 0.77  | 2.7        | 6.66      | 0.10  | 4.0        |

|    |                    |           |       |      |       |       |      |      |
|----|--------------------|-----------|-------|------|-------|-------|------|------|
| 35 | PC (A) 5EC 1G      | 1592.3279 | 2.84  | 0.13 | -1.1  | 2.32  | 0.10 | 0.4  |
| 36 | PC (B) 5EC 1G      | 1594.3436 | 18.29 | 0.56 | -0.4  | 24.20 | 0.11 | 1.3  |
| 37 | PA (A) 4EC 1EGC 1G | 1608.3228 | 2.95  | 0.08 | 1.3   | 1.79  |      | 1.9  |
| 38 | PA (B) 4EC 1EGC 1G | 1610.3385 | 3.66  | 0.69 | -4.4  | 2.59  | 0.67 | -3.0 |
| 39 | PC (B) 6EC         | 1730.3960 | 13.09 | 0.41 | -1.1  | 25.12 | 0.66 | 1.4  |
| 40 | PA (A) 5EC 1EGC    | 1744.3752 | 3.70  | 0.17 | -2.5  | 2.84  | 0.10 | -0.4 |
| 41 | PC (B) 5EC 2G      | 1746.3545 | 11.20 | 0.49 | 3.0   | 10.62 | 0.20 | 3.8  |
| 42 | PC (A) 6EC 1G      | 1880.3913 | 2.80  | 0.09 | -1.1  | 2.43  | 0.06 | 0.5  |
| 43 | PC (B) 6EC 1G      | 1882.4070 | 15.40 | 0.30 | -0.3  | 23.57 | 0.59 | 1.8  |
| 44 | PA (A) 5EC 1EGC 1G | 1896.3862 | 3.24  | 0.09 | 1.0   | 1.24  | 1.76 | 1.6  |
| 45 | PA (B) 5EC 1EGC 1G | 1898.4019 | 5.86  | 0.19 | -2.9  | 4.29  | 0.17 | -2.7 |
| 46 | PC (A) 7EC         | 2016.4437 | 3.36  | 0.80 | -3.2  | 2.92  | 0.08 | -1.2 |
| 47 | PC (B) 7EC         | 2018.4594 | 6.93  | 0.21 | -0.5  | 23.83 | 0.82 | 1.9  |
| 48 | PC (B) 6EC 2G      | 2034.4179 | 6.83  | 0.32 | 1.9   | 7.65  | 0.32 | 3.5  |
| 49 | PC (A) 7EC 1G      | 2168.4547 | 2.44  | 0.07 | 0.7   | 2.31  | 0.18 | 0.5  |
| 50 | PC (B) 7EC 1G      | 2170.4703 | 10.57 | 0.21 | -0.6  | 17.51 | 2.72 | 1.9  |
| 51 | PA (A) 6EC 1EGC 1G | 2184.4496 | 2.55  | 0.09 | 1.5   |       |      |      |
| 52 | PA (B) 6EC 1EGC 1G | 2186.4653 | 4.98  | 0.17 | -4.3  | 4.12  | 0.15 | -2.5 |
| 53 | PC (B) 8EC         | 2306.5228 | 4.24  | 0.24 | -1.4  | 11.74 | 4.53 | 0.8  |
| 54 | PC (B) 7EC 2G      | 2322.4813 | 5.42  | 0.80 | 1.7   | 13.87 | 0.38 | 2.3  |
| 55 | PC (B) 8EC 1G      | 2458.5337 | 5.89  | 0.74 | 0.1   | 8.77  | 0.29 | 1.9  |
| 56 | PA (B) 7EC 1EGC 1G | 2474.5286 | 2.45  | 0.26 | -6.8  | 1.74  | 0.10 | -8.8 |
| 57 | PC (B) 9EC         | 2594.5862 |       |      |       | 8.66  | 0.25 | 0.3  |
| 58 | PA (B) 8EC 1EGC    | 2610.5811 | 6.57  | 0.12 | -0.1  | 11.13 | 0.32 | -1.6 |
| 59 | PC (B) 9EC 1G      | 2746.5970 | 7.01  | 0.11 | 0.6   | 10.90 | 0.15 | -0.3 |
| 60 | PA (B) 8EC 3G      | 2762.5556 | 6.85  | 0.17 | 4.6   | 5.00  | 0.21 | 3.95 |
| 61 | PC (B) 10EC        | 2882.6496 | 6.55  | 0.21 | -11.9 | 9.89  | 0.14 | 0.3  |
| 62 | PC (B) 9EC 2G      | 2898.6081 | 6.77  | 0.16 | 1.9   | 7.68  | 0.18 | 1.3  |
| 63 | PC (B) 10EC 1G     | 3034.6605 | 3.25  | 0.10 | -3.0  | 6.05  | 0.16 | 2.7  |
| 64 | PA (B) 9EC 3G      | 3050.6190 |       |      |       | 9.89  | 0.24 | 0.62 |
| 65 | PC (B) 11EC        | 3170.7129 |       |      |       | 7.99  | 0.31 | 1.3  |
| 66 | PC (B) 10EC 2G     | 3186.6715 | 6.15  | 0.12 | 0.9   | 6.72  | 0.01 | 1.5  |
| 67 | PC (B) 11EC 1G     | 3322.7239 |       |      |       | 10.81 | 1.00 | 1.6  |
| 68 | PA (B) 11EC 1EGC   | 3474.7712 |       |      |       | 6.97  | 1.51 | -1.7 |
| 69 | PC (B) 12EC 1G     | 3610.7873 |       |      |       | 6.52  | 1.02 | 0.3  |
| 70 | PA (B) 11EC 3G     | 3626.7458 |       |      |       | 4.50  | 0.47 | 0.2  |
| 71 | PC (B) 13EC 1G     | 3898.8507 |       |      |       | 5.74  | 1.02 | 0.3  |

---
